# Supplementary material for: A type-II blue phosphorus/MoSe2 van der Waals heterostructure: improved electronic and optical properties via vertical electric field
Source: Royal Society of Chemistry journal article supplement (doi:10.1039/d0ma00413h), 2020-01-01
Supplement: d0ma00413h1.pdf [file d0ma00413h1.pdf]

## Supporting Information for

### A type-II blue phosphorus/MoSe<sub>2</sub> van der Waals heterostructure: improved electronic and optical properties via vertical electric field

Huabing Shu\*

School of Science, Jiangsu University of Science and Technology, Zhenjiang 212001, China

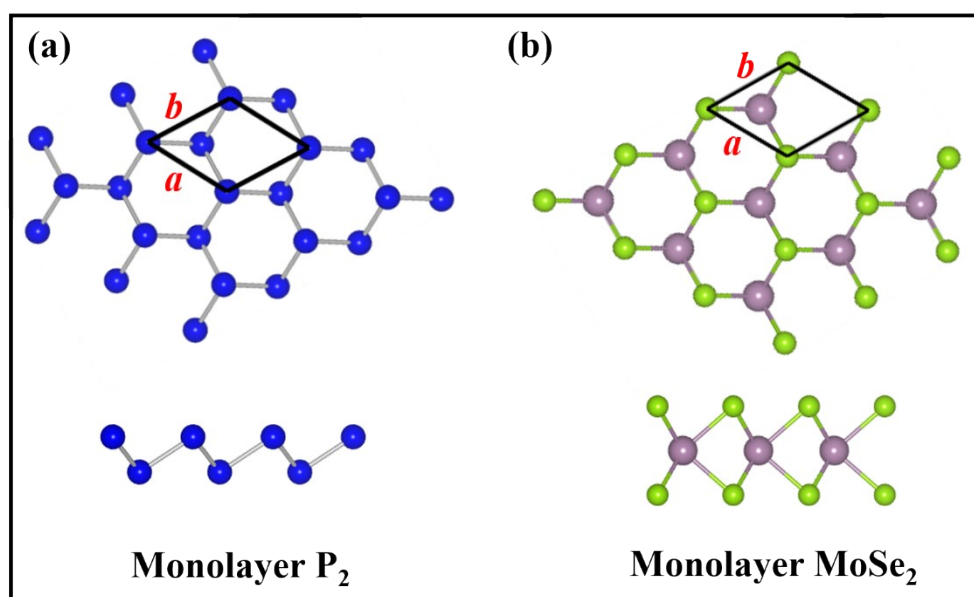

**Fig. S1** The optimized configurations of the P<sub>2</sub> (a) and MoSe<sub>2</sub> (b) monolayers. The P atom, Se atom, and Mo atom are denoted by blue sphere, green sphere, and purple sphere, respectively.

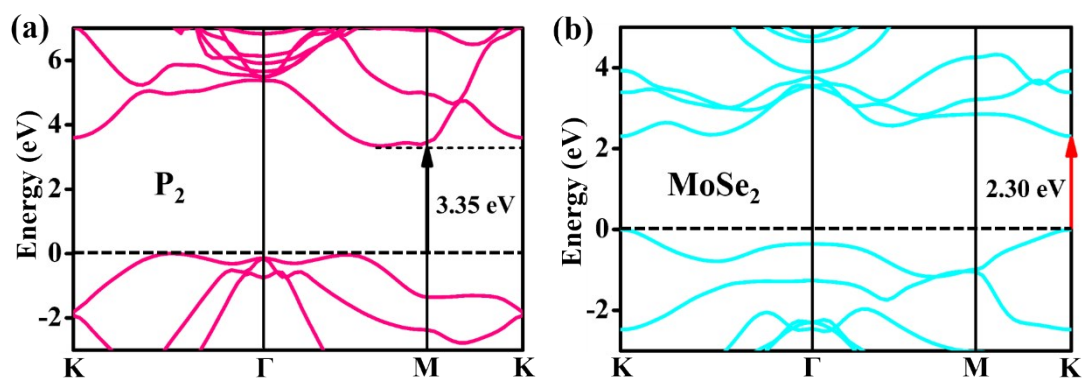

**Fig. S2** Quasi-particle band structures of the P<sub>2</sub> (a) and MoSe<sub>2</sub> (b) monolayers computed by the single-shot  $G_0W_0$  method. The valence band maximum is shifted to zero.

**Table S1** Structural parameters and formation energies of the  $P_2/\text{MoSe}_2$  vdW heterostructures: lattice constants ( $a/b$ ), bond lengths ( $l$ ), interlayer distances ( $d$ ), formation energies ( $E_f$ ).

| Type   | $a/b$<br>(Å) | $l_{\text{P-P}}$<br>(Å) | $l_{\text{Mo-Se}}$<br>(Å) | $d$<br>(Å) | $E_f$<br>(eV/unit) |
|--------|--------------|-------------------------|---------------------------|------------|--------------------|
| AA-I   | 3.291        | 2.270                   | 2.535                     | 3.697      | -0.212             |
| AA-II  | 3.296        | 2.275                   | 2.569                     | 3.799      | -0.201             |
| AB-I   | 3.294        | 2.270                   | 2.537                     | 3.852      | -0.185             |
| AB-II  | 3.288        | 2.269                   | 2.535                     | 3.809      | -0.191             |
| AB-III | 3.289        | 2.276                   | 2.570                     | 3.703      | -0.208             |

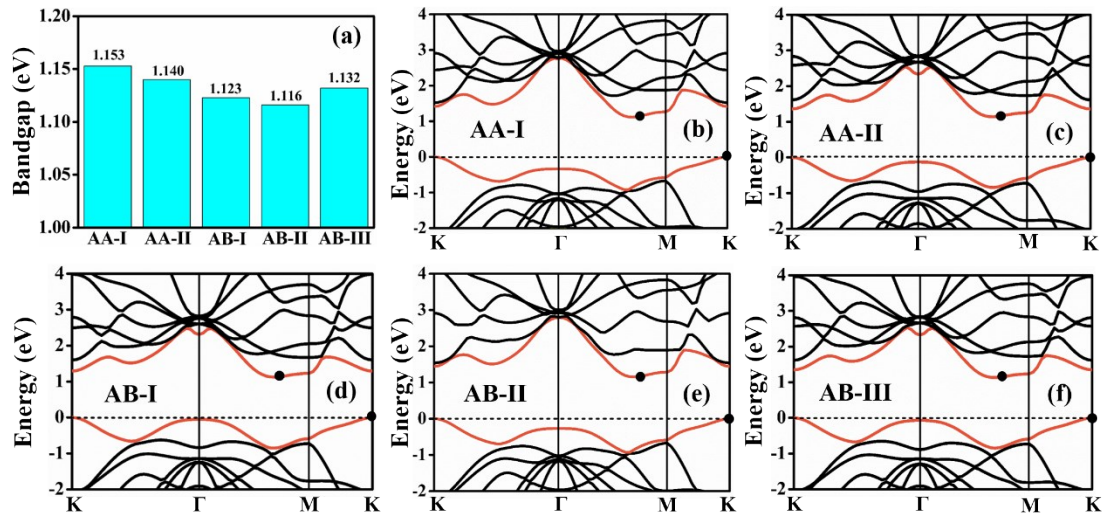

**Fig. S3** Variable bandgaps (a) and band structures (b)-(f) of the  $P_2/\text{MoSe}_2$  vdW heterostructures with different stacking configurations at the PBE level.

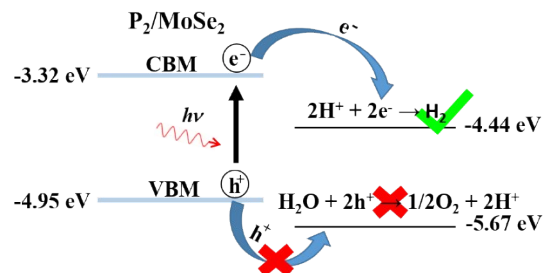

**Fig. S4** Illustration of photocatalytic water splitting of the  $P_2/\text{MoSe}_2$  vdW heterostructure at  $\text{pH} = 0$ .

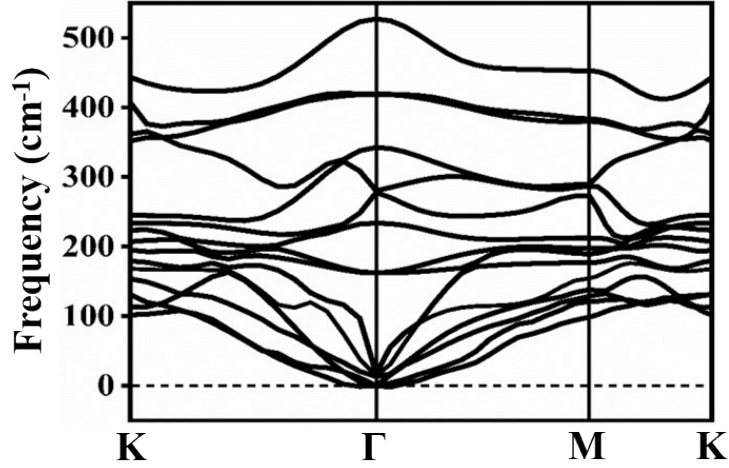

**Fig. S5** Phonon spectra of P<sub>2</sub>/MoSe<sub>2</sub> vdW heterostructure at the electric field of 0.4 V/Å.

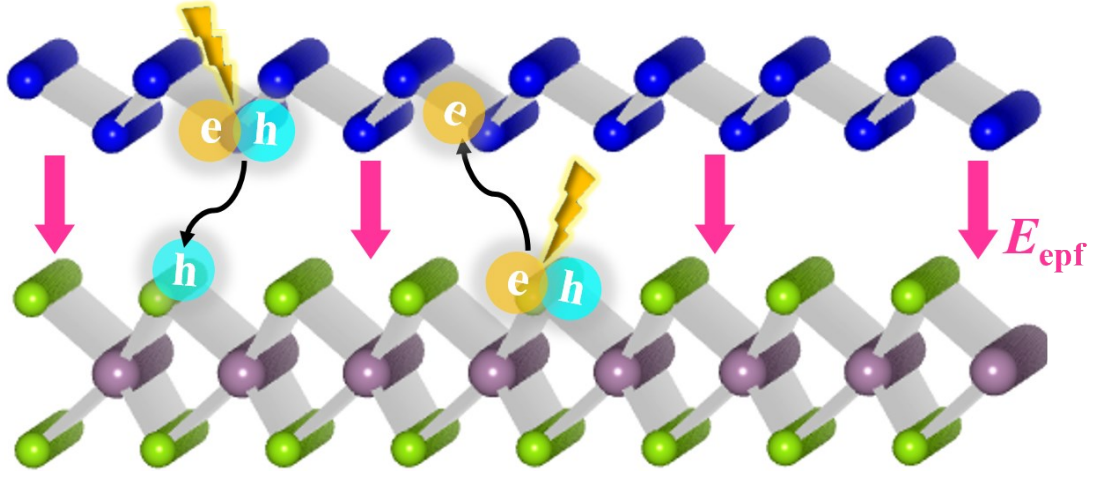

**Fig. S6** Schematic diagram of the separation of photoexcited electrons and holes on the interface under the electric polarized field.

**Table S2** Bader charge transfer ( $\Delta q$ ) and electric polarized field ( $E_{\text{epf}}$ ) between the P<sub>2</sub> layer and MoSe<sub>2</sub> layers induced by vertical electric field ( $E_{\text{ef}}$ ). The positive value of the  $\Delta q$  show the charges transfer from the P<sub>2</sub> layer to MoSe<sub>2</sub> layer. The negative value of the  $E_{\text{epf}}$  denotes the direction pointed from the P<sub>2</sub> layer to MoSe<sub>2</sub> layer. Units of the charge and electric field are  $10^{-2} e$  and V/Å, respectively.

|                  |       |        |        |        |        |        |        |        |        |
|------------------|-------|--------|--------|--------|--------|--------|--------|--------|--------|
| $E_{\text{ef}}$  | -0.40 | -0.30  | -0.20  | -0.10  | 0      | 0.10   | 0.20   | 0.30   | 0.40   |
| $\Delta q$       | -0.12 | 0.04   | 0.19   | 0.33   | 0.49   | 0.63   | 0.81   | 0.98   | 1.15   |
| $E_{\text{epf}}$ | 0.023 | -0.007 | -0.037 | -0.064 | -0.094 | -0.121 | -0.156 | -0.189 | -0.222 |

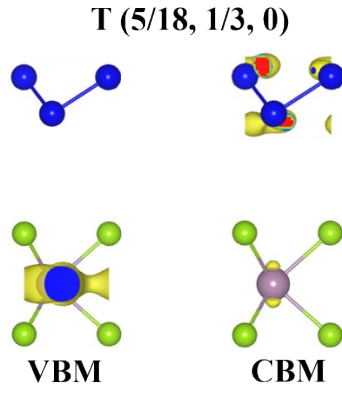

**Fig. S7** Decomposed charge density of the CBM and VBM at **T** point for the  $P_2/\text{MoSe}_2$  vdW heterstructure. Isosurface is set to  $3.0 \times 10^{-3} e/\text{\AA}^3$ .
